# Supplementary material
Source: PubMed Central journal article supplement (PMC7319034)
Supplement: NIHMS1589384-supplement-1.pdf [file NIHMS1589384-supplement-1.pdf]

TABLE E1. Treatment and outcomes by insurance status

| Variable                                | Total<br>(n = 13,462) | Private<br>(n = 4895) | Medicare/aid<br>(n = 7953) | Other Government<br>(n = 145) | Unknown<br>(n = 1134) | Uninsured<br>(n = 335) | P value |
|-----------------------------------------|-----------------------|-----------------------|----------------------------|-------------------------------|-----------------------|------------------------|---------|
| Extent of resection                     |                       |                       |                            |                               |                       |                        | <.001   |
| Lobectomy                               | 11,589 (86.1%)        | 4070 (83.1%)          | 7034 (88.4%)               | 124 (85.5%)                   | 115 (85.8%)           | 246 (73.4%)            |         |
| Pneumonectomy                           | 1873 (13.9%)          | 825 (16.9%)           | 919 (11.6%)                | 21 (14.5%)                    | 19 (14.2%)            | 89 (26.6%)             |         |
| Median days to definitive surgery (IQR) | 32 (15, 51)           | 29 (13, 48)           | 34 (16, 54)                | 34 (12.8, 57.2)               | 28 (11.5, 45.8)       | 36 (17.8, 58.5)        | <.001   |
| Adjuvant chemoradiation                 | 2068 (15.4%)          | 866 (17.7%)           | 1100 (13.8%)               | 30 (20.7%)                    | 21 (15.7%)            | 51 (15.2%)             | <.001   |
| Adjuvant chemotherapy                   | 9466 (70.3%)          | 3853 (78.7%)          | 5175 (65.1%)               | 94 (64.8%)                    | 102 (76.1%)           | 242 (72.2%)            | <.001   |
| 30-d unplanned readmission              | 563 (4.3%)            | 194 (4%)              | 345 (4.4%)                 | 5 (3.5%)                      | 5 (3.9%)              | 14 (4.3%)              | .892    |
| Median hospital LOS, days (IQR)         | 6 (4, 8)              | 5 (4, 7)              | 6 (4, 8)                   | 5 (4, 8)                      | 5 (4, 7)              | 5 (4, 8)               | <.001   |

IQR, Interquartile range.
